# Supplementary material for: Sulfur vacancies on MoS2 enhanced the activation of peroxymonosulfate through the co-existence of radical and non-radical pathways to degrade organic pollutants in wastewater
Source: Royal Society of Chemistry journal article supplement (doi:10.1039/d2ra02448a), 2022-01-01
Supplement: d2ra02448a1.pdf [file d2ra02448a1.pdf]

## Support Materials

### **Sulfur Vacancy on MoS<sub>2</sub> Enhanced the Activation of Peroxymonosulfate through the Co-existence of Radical and Non-radical Pathways to Degrade Organic Pollutants in Wastewater**

Cai-Wu Luo <sup>a, b, c, \*</sup>, Lei Cai <sup>c</sup>, Chao Xie <sup>c</sup>, Gang Li <sup>a</sup>, Tian-Jiao Jiang <sup>c</sup>

<sup>a</sup> State Key Laboratory of Safety and Health for Metal Mines, Sinosteel Maanshan General Institute of Mining Research Co., Ltd, 243000, China

<sup>b</sup> Fujian Provincial Key Lab of Coastal Basin Environment, Fujian Polytechnic Normal University, 350300, China

<sup>c</sup> School of Resource Environmental and Safety Engineering, University of South China, 421000, China

\* Corresponding author: Cai-Wu Luo;

Tel: +86-734-8282345;

E-mail addresses: [luocaiwu00@126.com](mailto:luocaiwu00@126.com).

**Figure S1**

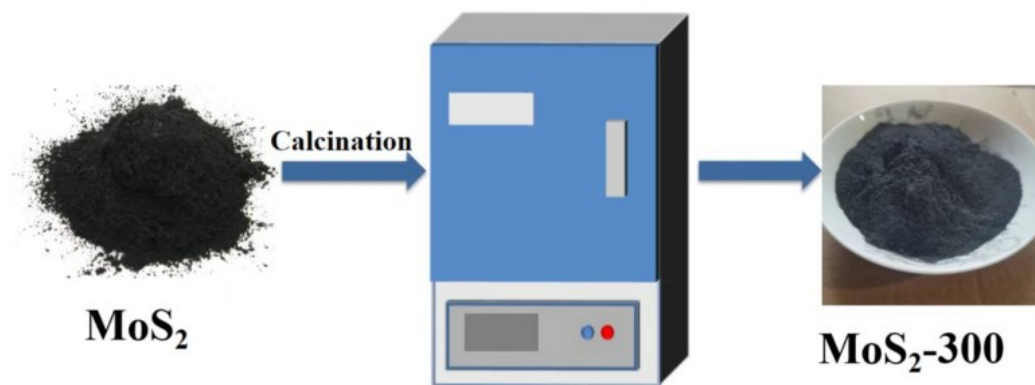

**Figure S1** Preparation step of MoS<sub>2</sub>-300 catalyst.

**Figure S2**

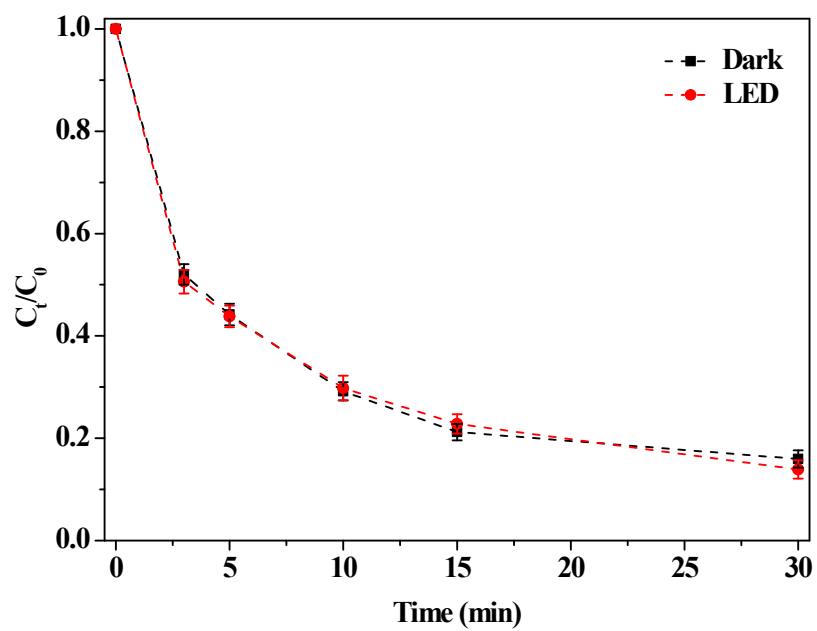

**Figure S2** Comparison of darkness and LED illumination on degradation of RhB.

Reaction conditions: [RhB] = 10 mg/L, [PMS] = 1.0 mM, [MoS<sub>2</sub>-300] = 1.0 g/L,  
initial pH = 3.0.

**Figure S3**

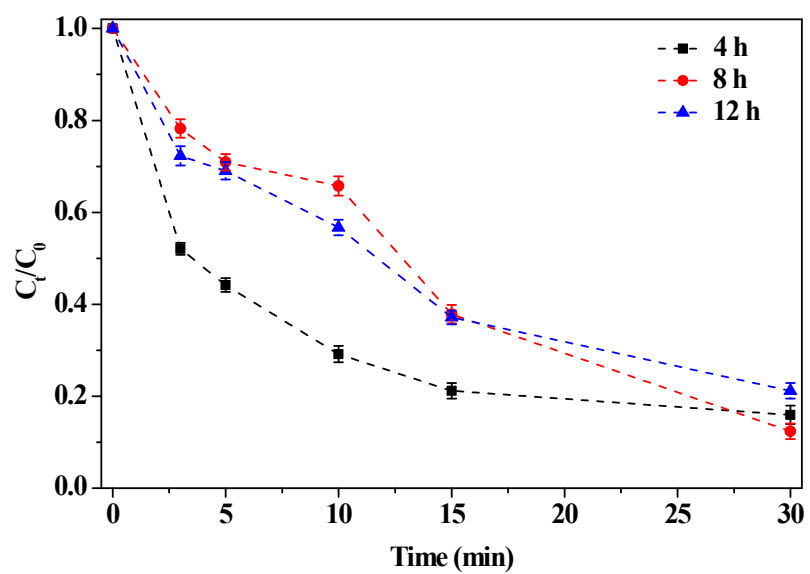

**Figure S3** Effect of the treated time on the degradation of RhB. Reaction conditions: [RhB] = 10 mg/L, [PMS] = 1.0 mM, [MoS<sub>2</sub>-300] = 1.0 g/L, initial pH = 3.0, in the darkness.

**Figure S4**

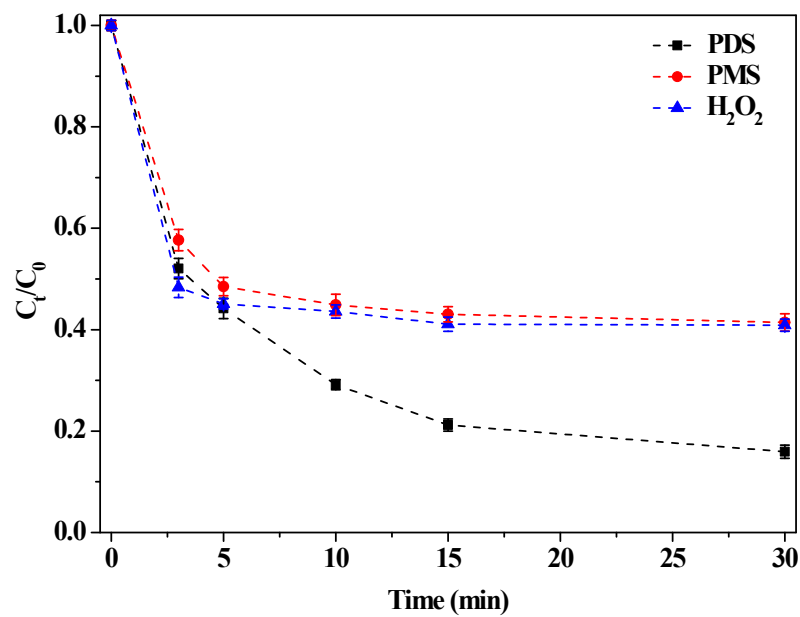

**Figure S4** Removal of RhB with different oxidation system. Reaction conditions: [RhB] = 10 mg/L, [Oxidants] = 1.0 mM, [MoS<sub>2</sub>-300] = 1.0 g/L, initial pH = 3.0, in the darkness.

**Figure S5**

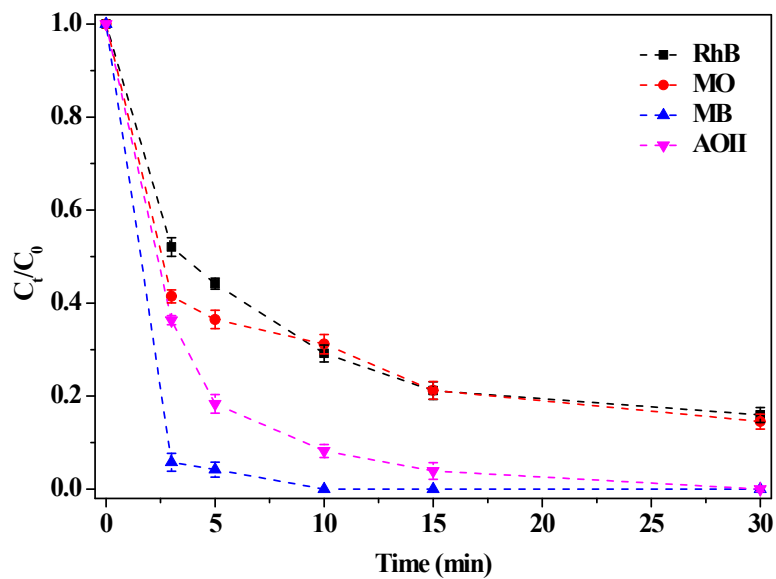

**Figure S5** Removal of organic pollutants. Reaction conditions: [Pollutants] = 10 mg/L, [MoS<sub>2</sub>-300] = 1.0 g/L, [PMS] = 1.0 mM, initial pH = 3.0, in the darkness.

**Figure S6**

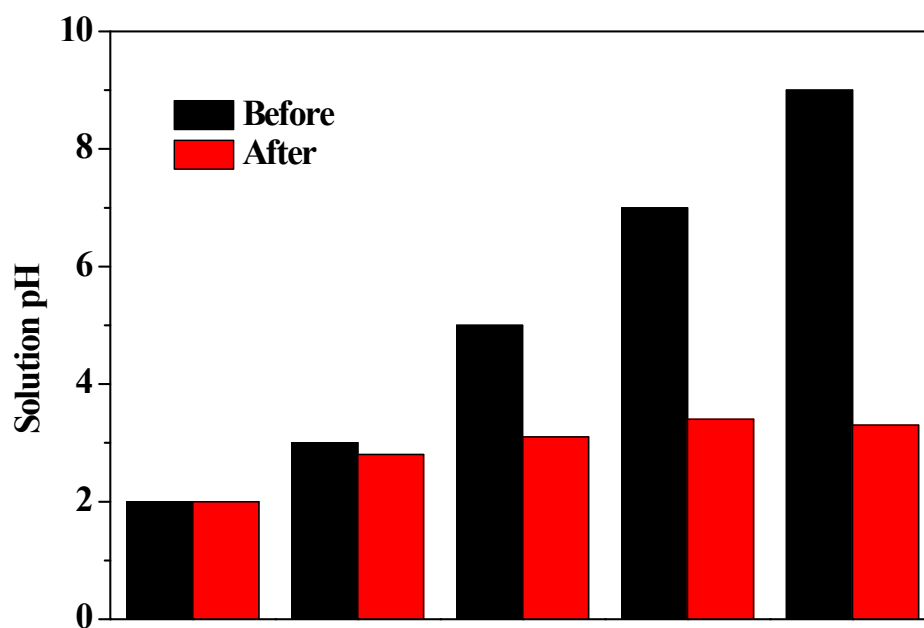

**Figure S6** Changes of solution pH before and after the reaction.

**Figure S7**

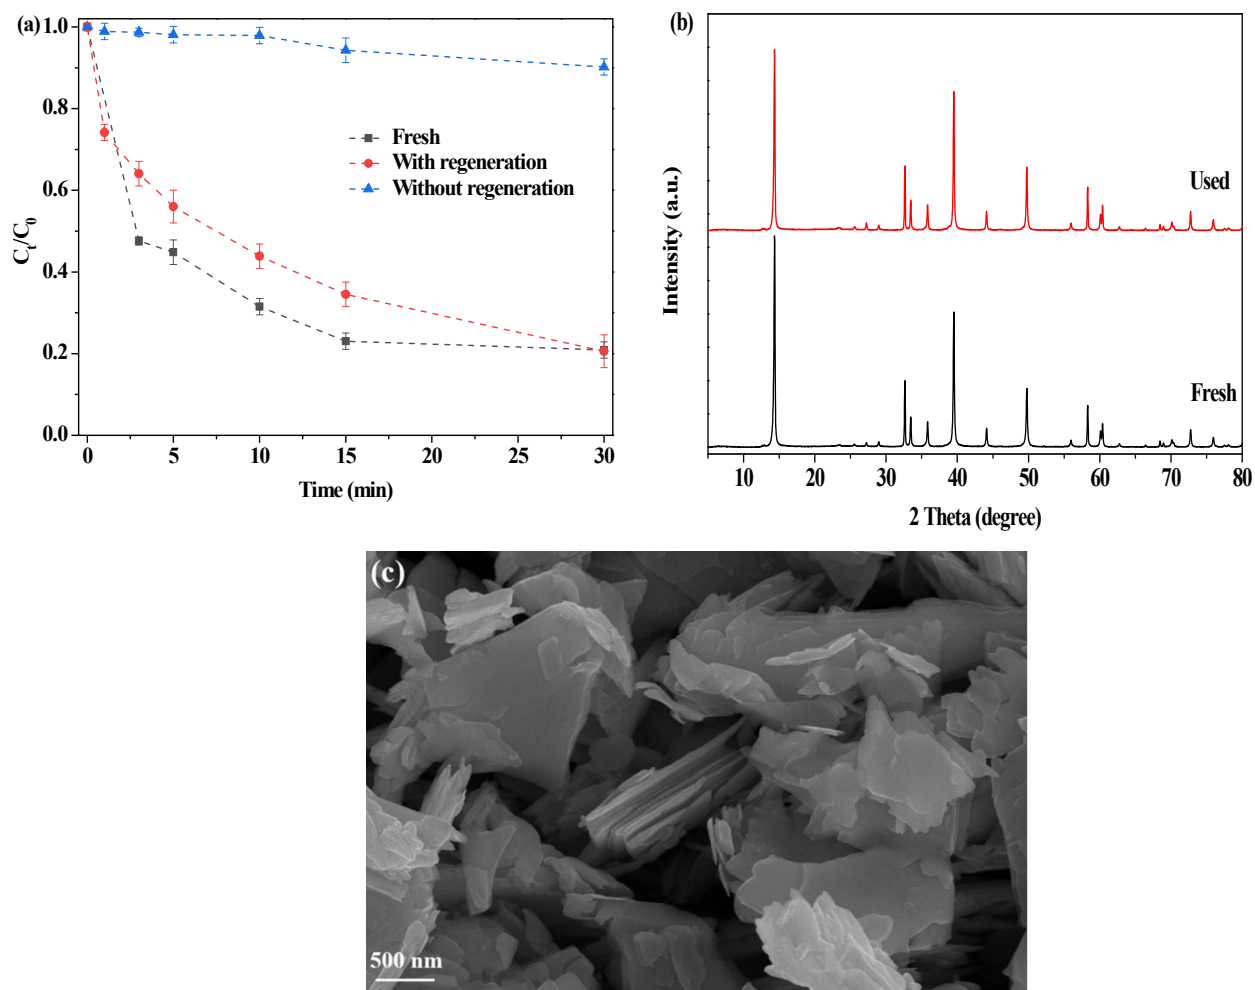

**Figure S7** (a) Removal of RhB without or with regeneration; (b) XRD patterns of fresh and used MoS<sub>2</sub> catalysts; (c) SEM image of used MoS<sub>2</sub>-300 catalyst. Reaction conditions: [RhB] = 10 mg/L, [PMS] = 0.5 mM, [MoS<sub>2</sub>-300] = 1.0 g/L, initial pH = 3.0, in the darkness.



**Figure S8**

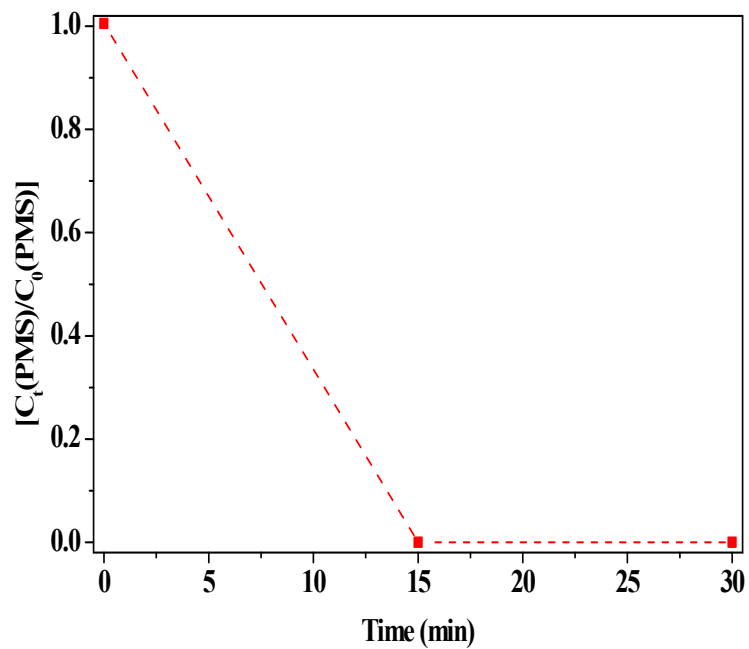

**Figure S8** Decomposition of PMS. Reaction conditions:  $[\text{RhB}] = 10 \text{ mg/L}$ ,  $[\text{MoS}_2\text{-}300] = 1.0 \text{ g/L}$ ,  $[\text{PMS}] = 1.0 \text{ mM}$ , initial  $\text{pH} = 3.0$ , in the darkness.

**Table S1** Changes of surface Mo(IV) concentration, ratios of Mo(IV) and Mo(VI), and 2H-MoS<sub>2</sub> and 1T-MoS<sub>2</sub> phases in catalysts with different temperatures by XPS characterization <sup>a</sup>.

| Catalysts             | Mo(IV) | Mo(IV)/Mo(VI) | 2H-MoS <sub>2</sub> /1T-MoS <sub>2</sub> <sup>b</sup> | 2H-MoS <sub>2</sub> /1T-MoS <sub>2</sub> <sup>c</sup> |
|-----------------------|--------|---------------|-------------------------------------------------------|-------------------------------------------------------|
| MoS <sub>2</sub>      | 98.3%  | 57.8          | 0.48                                                  | 0.50                                                  |
| MoS <sub>2</sub> -300 | 85.1%  | 5.7           | 0.62                                                  | 0.66                                                  |
| MoS <sub>2</sub> -500 | 58.8%  | 1.4           | 0.28                                                  | no                                                    |

<sup>a</sup>: Based on the peak area of each component; <sup>b</sup>: Mo 3d; <sup>c</sup>: S 2p.

**Table S2** The concentrations of detected elements in reaction solution after the fifth reaction by ICP-MS.

| Catalysts             | Mo (mg/L) | S (mg/L) |
|-----------------------|-----------|----------|
| MoS <sub>2</sub> -300 | 36.2      | 91.6     |
